# Supplementary material for: Innate and adaptive immune traits are differentially affected by genetic and environmental factors
Source: PubMed Central journal article supplement (PMC5227062; doi:10.1038/ncomms13850), 2017-01-05
Supplement: ncomms13850-s1.pdf [file ncomms13850-s1.pdf]

| Panel 1:<br>T Cell<br>Differentiation | Panel 2:<br>T Cell<br>Activation | Panel 3:<br>T Cell<br>Polarization | Panel 4:<br>NK Cell<br>Differentiation | Panel 5:<br>Stem cells;<br>Innaptive<br>Differentiation | Panel 6:<br>B Cell<br>Differentiation | Panel 7:<br>Myeloid<br>Cells |
|---------------------------------------|----------------------------------|------------------------------------|----------------------------------------|---------------------------------------------------------|---------------------------------------|------------------------------|
| Viability                             | Viability                        | Viability                          | Viability                              | Viability                                               | Viability                             | Viability                    |
| CD3                                   | CD3                              | CD3                                | CD2                                    | CD34                                                    | CD19                                  | CD14                         |
| CD4                                   | CD4                              | CD4                                | CD3                                    |                                                         | CD20                                  | CD11c                        |
| CD8                                   | CD8                              | CD8                                | CD4                                    | CD3                                                     |                                       | CD123                        |
|                                       |                                  |                                    | CD16                                   | CD4                                                     | IgA                                   | HLA-DR                       |
| CD27                                  | CD25                             | CD45RA                             | CD56                                   | CD8                                                     | IgD                                   |                              |
| CD45RA                                | CD127                            | CCR7                               |                                        |                                                         | IgG                                   | CD1c                         |
| CCR7                                  | CD39                             | PD1                                | CCR7                                   | CD1d                                                    | IgM                                   | CD141                        |
|                                       | CD73                             |                                    | CD62L                                  |                                                         |                                       |                              |
| CD28                                  |                                  | CXCR3                              | CD158a                                 | TCR-V $\gamma$ 9                                        | CD5                                   | CD8                          |
| CD31                                  | CD45RA                           | CXCR5                              | CD158b                                 | TCR-V $\delta$ 1                                        | CD10                                  | CD16                         |
| CD57                                  | CD38                             | CCR4                               | CD314                                  | TCR-V $\delta$ 2                                        | CD21                                  | CD32                         |
| CD95                                  | CCR5                             | CCR6                               | CD335                                  |                                                         | CD24                                  | CD64                         |
| CD127                                 | PD1                              | CCR10                              | CD337                                  | CD27                                                    | CD27                                  | CD83                         |
| CD244                                 | HLA-DR                           | CD161                              |                                        | CD28                                                    | CD95                                  | CD274                        |
|                                       |                                  |                                    |                                        | CD45RA                                                  | CD38                                  | HLA-DR                       |
|                                       |                                  |                                    |                                        | CCR7                                                    |                                       |                              |
|                                       |                                  |                                    |                                        | CCR5                                                    |                                       |                              |

**Supplementary Figure 1. Immunophenotyping panels used in this study.** Seven 13 or 14-color panels were optimized to enumerate and phenotype different leukocyte populations from cryopreserved PBMC. All seven panels were applied to all subjects using staining temperatures optimized for each panel. Reagents are roughly ordered by: major lineage-defining markers; sub-lineage defining markers; and then markers to assess differentiation stages, activation state, and/or functional capacity.

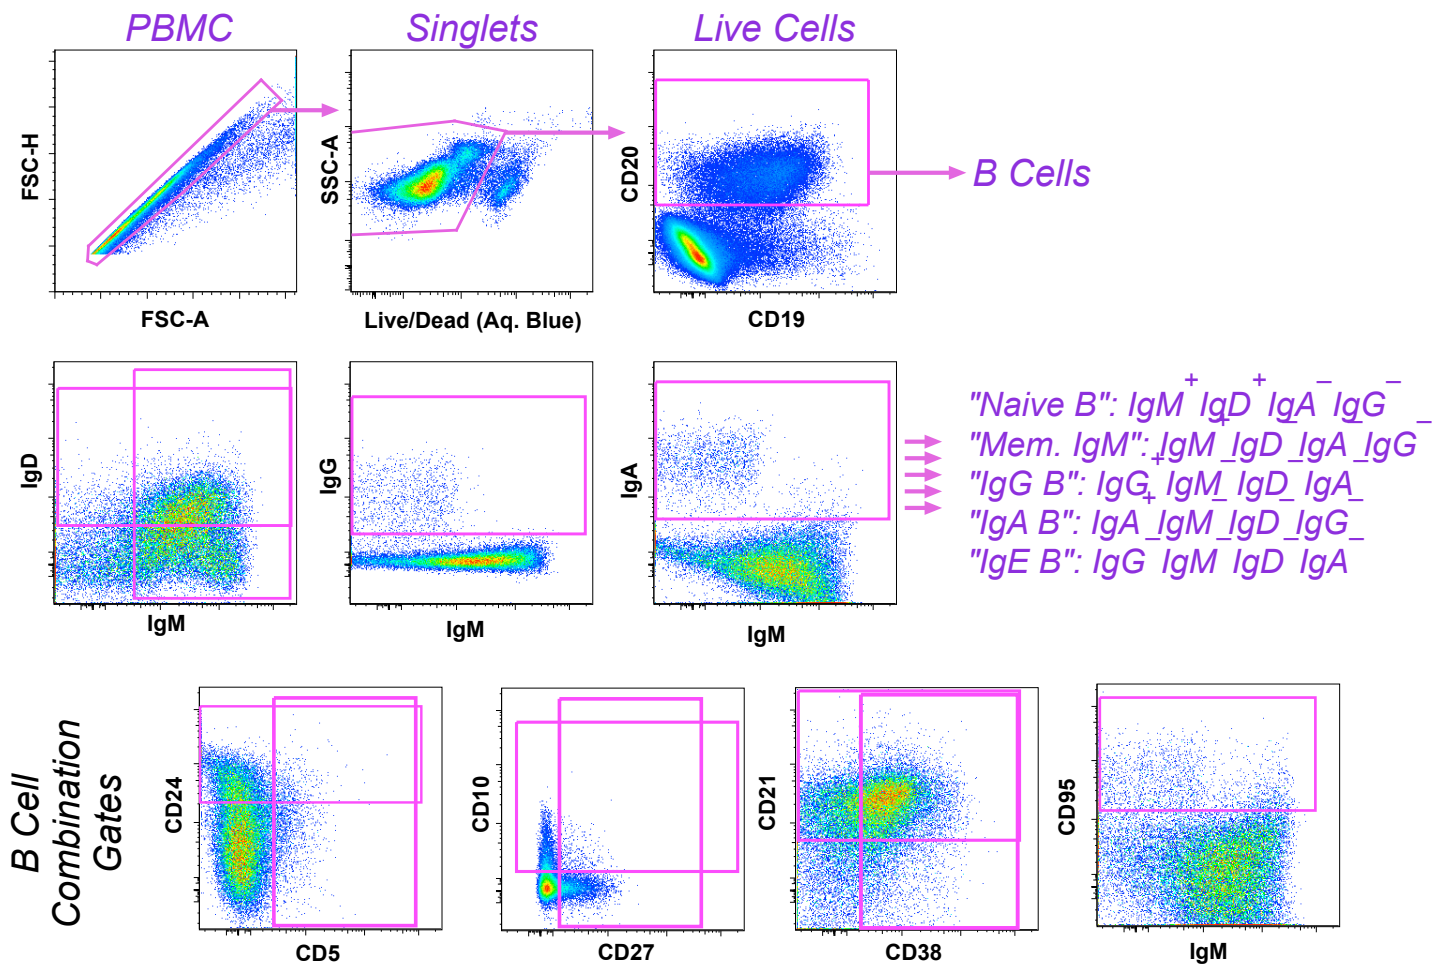

**Supplementary Figure 2. Gating for B cell subsets.** A different gating strategy was used for Panel 6 than originally described<sup>8</sup>. B cells were broadly identified as CD20<sup>+</sup> live lymphocytes (top). Within these cells, gates identifying isotype expression were combined to as-purely-as-possible identify naïve and memory B cells; within the latter, IgM, IgG, IgA, and putative IgE-expressing cells were gated. Within each of these five, all combinations of the seven markers (positive, negative, or ignored) were created by Boolean gating as previously described<sup>8</sup>. This results in 2,187 CSF traits for each of the five isotype-defined subsets.

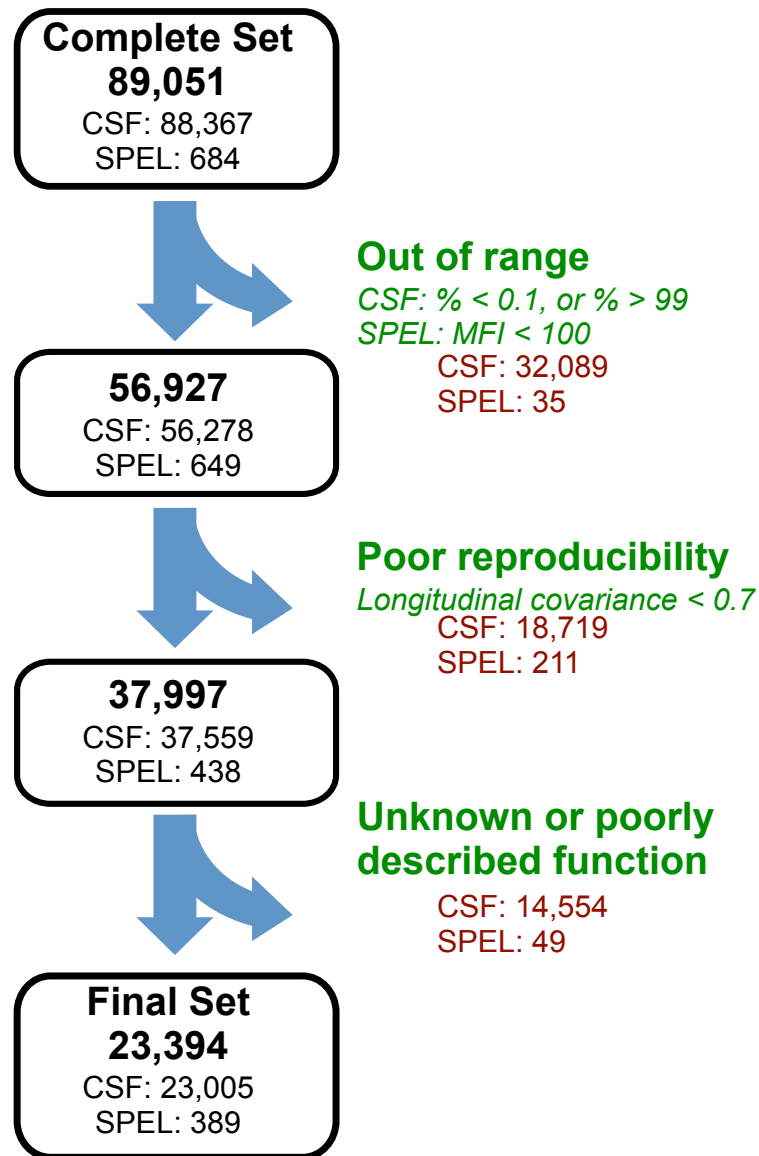

**Supplementary Figure 3. Trait QC workflow.** Structured equation modelling was performed on a robust subset of all traits. Three different filters (shown in green) were applied in succession to the original 89,051 traits to result in the final 23,394. The last filter was a subjective, eliminating cell populations such as CD4<sup>+</sup>CD8<sup>+</sup> (double positive) or CD4<sup>-</sup>CD8<sup>-</sup> (double negative) T cells from consideration.
